# Supplementary material for: Skeletal Status in Patients Scheduled for Elective Lumbar Spine Surgery: Comparison of Discectomy, Decompression, Fusion, and Revision
Source: PubMed Central journal article supplement — Global Spine J. 2022 May 23;14(2):380–9. doi: 10.1177/21925682221105005 (PMC10802513; doi:10.1177/21925682221105005), 2022-05-23
Supplement: sj-pdf-1-gsj-10.1177_21925682221105005.pdf [file sj-pdf-1-gsj-10.1177_21925682221105005.pdf]

## Supplementary Material

### Skeletal status in patients scheduled for elective lumbar spine surgery:

#### Comparison of discectomy, decompression, fusion and revision

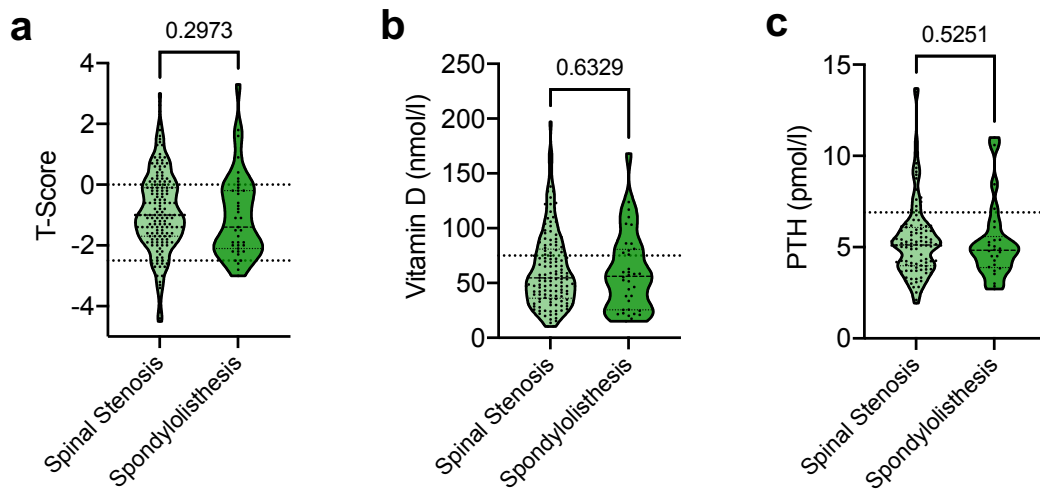

**Supplementary Fig. 1: Comparison of BMD T-score and laboratory mineral metabolism values between patients with spinal stenosis and degenerative spondylolisthesis.** (a) BMD T-score assessed by DXA, (b) vitamin D, and (c) PTH. The dashed lines of the truncated violin plots represent the median and quartiles. P-values are given above the diagrams.
